# Supplementary material for: Discovery and Targeted LC-MS/MS of Purified Polerovirus Reveals Differences in the Virus-Host Interactome Associated with Altered Aphid Transmission
Source: PubMed Central journal article supplement (PMC3484124; doi:10.1371/journal.pone.0048177), 2012-10-30
Supplement: pone.0048177.s004.pdf [file pone.0048177.s004.pdf]

Table S1. Plant proteins found in sucrose gradient fractions from healthy plants, Protein ID % probability >99%

| <u>NCBI Protein Name</u>                                                                                                             | <u>NCBI Accession</u> | <u>BLAST Annotation</u>                                 |
|--------------------------------------------------------------------------------------------------------------------------------------|-----------------------|---------------------------------------------------------|
| HIS4; DNA binding [Arabidopsis thaliana]                                                                                             | gi 15226944           |                                                         |
| beta-D-glucosidase [Avena sativa]                                                                                                    | gi 505279             |                                                         |
| predicted protein [Hordeum vulgare subsp. vulgare]                                                                                   | gi 326500636          | ribosomal protein S4                                    |
| RecName: Full=Ribulose biphosphate carboxylase large chain; Short=RuBisCO large subunit; Flags: Precursor                            | gi 1346964            |                                                         |
| predicted protein [Hordeum vulgare subsp. vulgare]                                                                                   | gi 326497321          | putative pyrophosphate-dependent phosphofructo-1-kinase |
| predicted protein [Hordeum vulgare subsp. vulgare]                                                                                   | gi 326532144          | putative pyrophosphate-dependent phosphofructo-1-kinase |
| predicted protein [Hordeum vulgare subsp. vulgare]                                                                                   | gi 326499005          | histone 2A                                              |
| PREDICTED: glyceraldehyde-3-phosphate dehydrogenase B, chloroplastic-like [Brachypodium distachyon]                                  | gi 357114230          |                                                         |
| PREDICTED: 6-phosphofructokinase 3-like [Brachypodium distachyon]                                                                    | gi 357132904          |                                                         |
| beta-D-glucosidase beta subunit precursor [Avena sativa]                                                                             | gi 4106413            |                                                         |
| Chain E, Localization Of The Large Subunit Ribosomal Proteins Into A 5.5 A Cryo-Em Map Of Triticum Aestivum Translating 80s Ribosome | gi 313103578          |                                                         |
| photosystem I subunit VII [Zygnema circumcarinatum]                                                                                  | gi 108796706          |                                                         |
| predicted protein [Hordeum vulgare subsp. vulgare]                                                                                   | gi 326496288          | 40S ribosomal protein S11                               |
| PREDICTED: 60S ribosomal protein L6-like [Brachypodium distachyon]                                                                   | gi 357140576          |                                                         |
| Os12g0567700 [Oryza sativa Japonica Group]                                                                                           | gi 115489150          | 60S ribosomal protein L2                                |
| Os01g0679700 [Oryza sativa Japonica Group]                                                                                           | gi 115439177          | 60S ribosomal protein L37a                              |
| putative ribosomal protein L26 [Oryza sativa Japonica Group]                                                                         | gi 12328551           |                                                         |
| PREDICTED: 40S ribosomal protein S18-like [Brachypodium distachyon]                                                                  | gi 357111429          |                                                         |
| predicted protein [Hordeum vulgare subsp. vulgare]                                                                                   | gi 326488173          | 60S ribosomal protein L4                                |
| Chain i, Localization Of The Large Subunit Ribosomal Proteins Into A 5.5 A Cryo-Em Map Of Triticum Aestivum Translating 80s Ribosome | gi 313103611          |                                                         |
| Os02g0287000 [Oryza sativa Japonica Group]                                                                                           | gi 115445597          | 40S ribosomal protein S3a                               |
| ubiquitin [Lolium temulentum]                                                                                                        | gi 168472729          |                                                         |
| Os09g0502000 [Oryza sativa Japonica Group]                                                                                           | gi 115479981          | 60S ribosomal protein L32-1-like                        |
| hypothetical protein LOC100193262 [Zea mays]                                                                                         | gi 212722360          | 40S ribosomal protein S26                               |
| Chain k, Localization Of The Large Subunit Ribosomal Proteins Into A 5.5 A Cryo-Em Map Of Triticum Aestivum Translating 80s Ribosome | gi 313103613          |                                                         |
| predicted protein [Hordeum vulgare subsp. vulgare]                                                                                   | gi 326488131          | 40S ribosomal protein S8                                |
| predicted protein [Hordeum vulgare subsp. vulgare]                                                                                   | gi 326500108          | 50S ribosomal protein L24, chloroplastic-like           |
| beta-D-glucan exohydrolase, isoenzyme ExoII [Hordeum vulgare subsp. vulgare]                                                         | gi 1203832            |                                                         |
| Os01g0348700 [Oryza sativa Japonica Group]                                                                                           | gi 115436432          | 60S ribosomal protein L23a                              |
| PREDICTED: serine hydroxymethyltransferase, mitochondrial-like [Brachypodium distachyon]                                             | gi 357116394          |                                                         |
| Os07g0622100 [Oryza sativa Japonica Group]                                                                                           | gi 115473429          | 40S ribosomal protein S6                                |
| fructose-bisphosphate aldolase, putative [Ricinus communis]                                                                          | gi 255581400          |                                                         |
| predicted protein [Hordeum vulgare subsp. vulgare]                                                                                   | gi 326489899          | 50S ribosomal protein L15, chloroplastic-like           |
| Os01g0896800 [Oryza sativa Japonica Group]                                                                                           | gi 115441607          | 60S ribosomal protein L5-1                              |
| RecName: Full=60S ribosomal protein L10                                                                                              | gi 18203270           |                                                         |
| unknown [Picea sitchensis]                                                                                                           | gi 116781756          | 60S ribosomal protein L13a-4-like                       |
| PREDICTED: 40S ribosomal protein S14-like [Brachypodium distachyon]                                                                  | gi 357123442          |                                                         |
| PREDICTED: 40S ribosomal protein SA-like [Brachypodium distachyon]                                                                   | gi 357121904          |                                                         |
| Os02g0137200 [Oryza sativa Japonica Group]                                                                                           | gi 115444097          | 50S ribosomal protein L3, chloroplastic-like            |
| PREDICTED: ruBisCO large subunit-binding protein subunit alpha, chloroplastic-like [Brachypodium distachyon]                         | gi 357167236          |                                                         |
| ribosomal protein L2 [Oryza sativa Indica Group]                                                                                     | gi 109156625          |                                                         |
| Ribulose-1,5-bisphosphate carboxylase/oxygenase [Mitrasacme pilosa]                                                                  | gi 6688796            |                                                         |
| cysteine protease 1 [Zea mays]                                                                                                       | gi 226496089          |                                                         |
| ribulose biphosphate carboxylase oxygenase [Stenanthemum pomaderroides]                                                              | gi 9968778            |                                                         |
| fructose-1,6-bisphosphatase, cytosolic,putative,expressed [Triticum aestivum]                                                        | gi 300681469          |                                                         |
| PREDICTED: uncharacterized protein LOC100835762 [Brachypodium distachyon]                                                            | gi 357112407          | Lectin binding protein                                  |
