# Supplementary material for: Discovery and Targeted LC-MS/MS of Purified Polerovirus Reveals Differences in the Virus-Host Interactome Associated with Altered Aphid Transmission
Source: PubMed Central journal article supplement (PMC3484124; doi:10.1371/journal.pone.0048177), 2012-10-30
Supplement: pone.0048177.s005.pdf [file pone.0048177.s005.pdf]

Table S2. Peak areas, T-test results, and retention time coefficient of variation for plant peptides detected in aphids fed on CRDV-RPV infected or healthy plants (reported in Table 5)

| ReplicateName <sup>a</sup> | Sequence   | RT <sup>b</sup> | Average RT | Precursor Mz | Total Area <sup>c</sup> | Normalized Area | Fold-change <sup>d</sup> | Log2 Fold Change | T-test   | RT CV (%) |
|----------------------------|------------|-----------------|------------|--------------|-------------------------|-----------------|--------------------------|------------------|----------|-----------|
| RPV_neg_RPVhost            | SQTGDFDHNR | 21.89           | 22.05      | 588.755058   | 1015623                 | 934373.16       | 0.788945426              | -0.342002587     | 0.466257 | 9.954705  |
| RPV_neg_RPVhost2           | SQTGDFDHNR | 23.47           |            |              | 833912                  | 767199.04       |                          |                  |          |           |
| RPV_neg_RPVhost3           | SQTGDFDHNR | 25.65           |            |              | 430855                  | 396386.6        |                          |                  |          |           |
| RPV_plus_RPVhost           | SQTGDFDHNR | 21.09           |            |              | 466487                  |                 |                          |                  |          |           |
| RPV_plus_RPVhost2          | SQTGDFDHNR | 19.57           |            |              | 708443                  |                 |                          |                  |          |           |
| RPV_plus_RPVhost3          | SQTGDFDHNR | 20.63           |            |              | 480245                  |                 |                          |                  |          |           |
| RPV_neg_RPVhost            | IPMFAYVSR  | 40.34           | 40.44      | 542.286419   | 836229                  | 769330.68       | 1.007770703              | 0.011167421      | 0.967548 | 1.737617  |
| RPV_neg_RPVhost2           | IPMFAYVSR  | 41.03           |            |              | 427102                  | 392933.84       |                          |                  |          |           |
| RPV_neg_RPVhost3           | IPMFAYVSR  | 41.53           |            |              | 754913                  | 694519.96       |                          |                  |          |           |
| RPV_plus_RPVhost           | IPMFAYVSR  | 39.91           |            |              | 589209                  |                 |                          |                  |          |           |
| RPV_plus_RPVhost2          | IPMFAYVSR  | 39.71           |            |              | 575426                  |                 |                          |                  |          |           |
| RPV_plus_RPVhost3          | IPMFAYVSR  | 40.11           |            |              | 706578                  |                 |                          |                  |          |           |
| RPV_neg_RPVhost            | FGGDYCCR   | 5.54            | 5.46       | 568.218408   | 43128                   | 39677.76        | 4.07839288               | 2.02800076       | 0.013361 | 6.139949  |
| RPV_neg_RPVhost2           | FGGDYCCR   | 5.67            |            |              | 44452                   | 40895.84        |                          |                  |          |           |
| RPV_neg_RPVhost3           | FGGDYCCR   | 5.97            |            |              | 32503                   | 29902.76        |                          |                  |          |           |
| RPV_plus_RPVhost           | FGGDYCCR   | 5.11            |            |              | 137250                  |                 |                          |                  |          |           |
| RPV_plus_RPVhost2          | FGGDYCCR   | 5.11            |            |              | 143753                  |                 |                          |                  |          |           |
| RPV_plus_RPVhost3          | FGGDYCCR   | 5.38            |            |              | 169563                  |                 |                          |                  |          |           |
| RPV_neg_RPVhost            | VLYSSCYVR  | 26.09           | 25.95      | 573.784241   | 26247                   | 24147.24        | 3.122682746              | 1.642786004      | NC       | 1.77628   |
| RPV_neg_RPVhost2           | VLYSSCYVR  | 26.68           |            |              | 25214                   | 23196.88        |                          |                  |          |           |
| RPV_neg_RPVhost3           | VLYSSCYVR  | 26.12           |            |              | ND                      | ND              |                          |                  |          |           |
| RPV_plus_RPVhost           | VLYSSCYVR  | 25.46           |            |              | 51534                   |                 |                          |                  |          |           |
| RPV_plus_RPVhost2          | VLYSSCYVR  | 25.46           |            |              | 74584                   |                 |                          |                  |          |           |
| RPV_plus_RPVhost3          | VLYSSCYVR  | 25.92           |            |              | 95643                   |                 |                          |                  |          |           |
| RPV_neg_RPVhost            | SDSIITAYR  | 7.72            | 7.48       | 513.266738   | 42205                   | 38828.6         | 6.24597266               | 2.642926254      | 0.000363 | 6.278016  |
| RPV_neg_RPVhost2           | SDSIITAYR  | 7.68            |            |              | 33478                   | 30799.76        |                          |                  |          |           |
| RPV_neg_RPVhost3           | SDSIITAYR  | 8.21            |            |              | 45702                   | 42045.84        |                          |                  |          |           |
| RPV_plus_RPVhost           | SDSIITAYR  | 7.06            |            |              | 231763                  |                 |                          |                  |          |           |
| RPV_plus_RPVhost2          | SDSIITAYR  | 7.02            |            |              | 233367                  |                 |                          |                  |          |           |
| RPV_plus_RPVhost3          | SDSIITAYR  | 7.19            |            |              | 232384                  |                 |                          |                  |          |           |
| RPV_neg_RPVhost            | GLGMIAEEVK | 6.96            | 6.63       | 523.781167   | ND                      | ND              | NC                       | NC               | NC       | 2.264119  |
| RPV_neg_RPVhost2           | GLGMIAEEVK | 6.56            |            |              | ND                      | ND              |                          |                  |          |           |
| RPV_neg_RPVhost3           | GLGMIAEEVK | 6.83            |            |              | ND                      | ND              |                          |                  |          |           |
| RPV_plus_RPVhost           | GLGMIAEEVK | 6.4             |            |              | 269335                  |                 |                          |                  |          |           |
| RPV_plus_RPVhost2          | GLGMIAEEVK | 6.4             |            |              | 288705                  |                 |                          |                  |          |           |
| RPV_plus_RPVhost3          | GLGMIAEEVK | 6.66            |            |              | 333112                  |                 |                          |                  |          |           |

a: RPV\_Plus samples are proteins collected from aphids reared on RPV infected plants, RPV\_neg samples are proteins from aphids reared on healthy plants

b: measured retention time (RT)

c: peak areas as reported or not detected (ND)

d: fold-change calculated as peak areas of RPV/healthy samples or not calculated (NC)
